# Supplementary material for: An amorphous hierarchical MnO2/acetylene black composite with boosted rate performance as an anode for lithium-ion batteries
Source: Royal Society of Chemistry journal article supplement (doi:10.1039/d1dt01894a), 2021-01-01
Supplement: d1dt01894a1.pdf [file d1dt01894a1.pdf]

1

## Supporting Information

2 Xiaole Zhang, Song Li\*, Shenghe Wang, Zhenxu Wang, Zhongsheng Wen, Shijun Ji,

3 Juncai Sun

4 Institute of Materials and Technology, Dalian Maritime University, Dalian 116026,

5 China

6 \*Corresponding author. E-mail: lisong@dmlu.edu.cn (S Li).

7

8

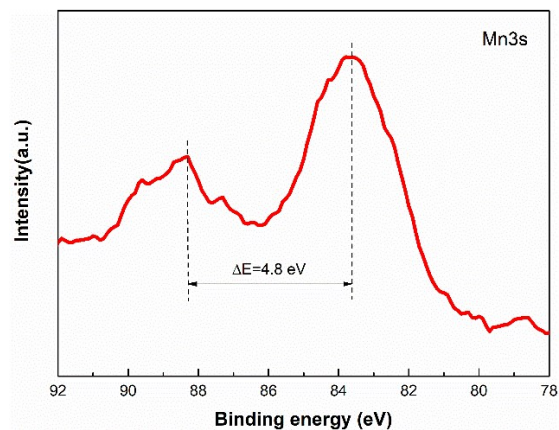

1

2

**Fig. S1.** High-resolution Mn 3s of a-MnO<sub>2</sub>/AB.

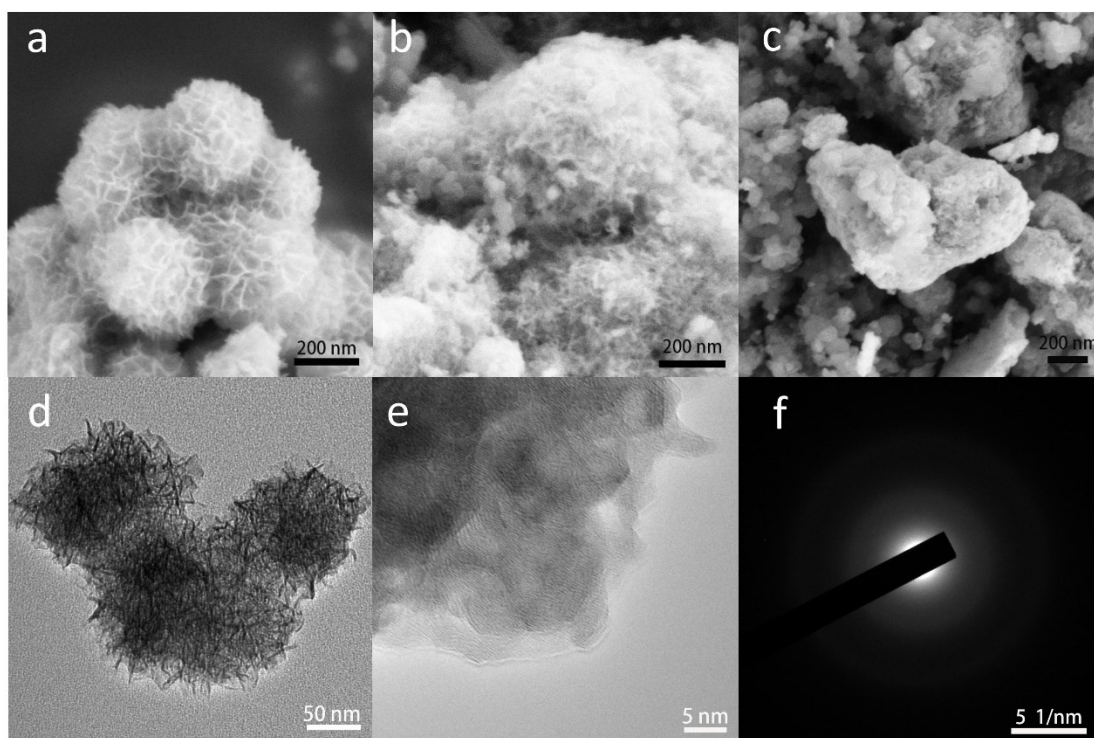

3

4

**Fig. S2.** SEM images of (a) a-MnO<sub>2</sub>, (b) a-MnO<sub>2</sub>/AB and (c) a-MnO<sub>2</sub>-500/AB, (d)TEM and (e)

5

HRTEM images and corresponding SEAD pattern (f) of a-MnO<sub>2</sub>/AB.

6

As shown in **Fig. S2**, a-MnO<sub>2</sub> nanosheets are interlinked to form a hierarchical porous sphere.

7

The HRTEM image of a-MnO<sub>2</sub> exhibits no observable lattice fringing, confirming the present of

8

amorphous phase. Furthermore, the selected area diffraction (SAED) of a-MnO<sub>2</sub>/AB shows faint

9

diffraction rings due to the amorphous nature.

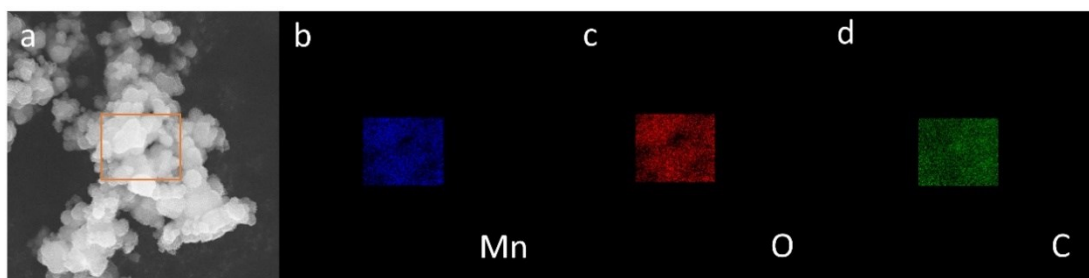

Fig. S3. EDS mappings of Mn, O and C in a-MnO<sub>2</sub>/AB.

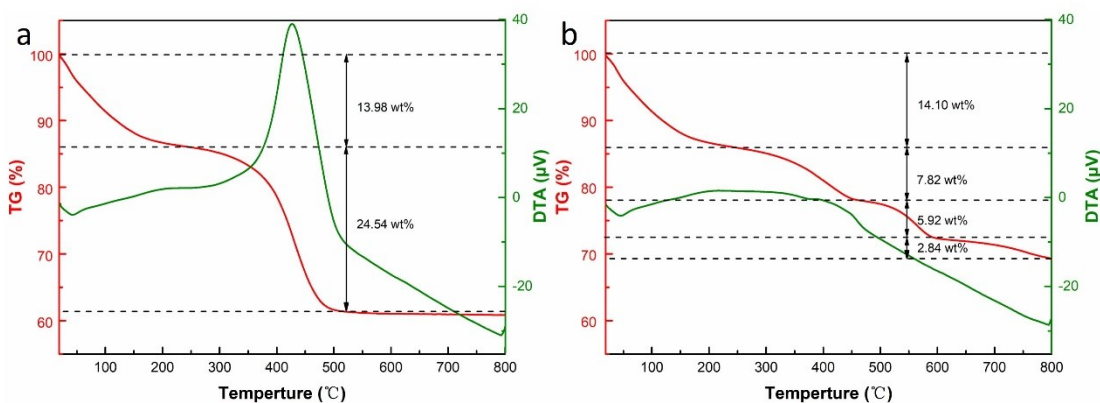

Fig. S4. TGA results under air (a) and N<sub>2</sub> (b) conditions for a-MnO<sub>2</sub>/AB.

The weight loss from room temperature to 250 °C under air is associated with the evaporation of water, and the apparent mass reduction between 250 °C and 500 °C is due to the complete oxidation of AB. The results indicate that the percentage of AB in a-MnO<sub>2</sub>/AB composite is 24.54 wt%. In addition, the weight loss is negligible from 500 °C to 800 °C. In contrast, the weight loss from room temperature to 250 °C in N<sub>2</sub> was similar to that in air. The decrease in weight loss (7.82 wt%) in the range of 250 °C ~ 470 °C is mainly due to the incomplete oxidation of AB in N<sub>2</sub>, indicating some amount of AB can be retained after the heat treatment in N<sub>2</sub>. There are still weight loss of 5.92 wt% and 2.84 wt% between 500 °C and 800 °C, which may be related to the continuous loss of oxygen of MnO<sub>2</sub> in N<sub>2</sub>. It demonstrates that the MnO<sub>2</sub> is more prone to oxygen loss in N<sub>2</sub>. Therefore, the heat treatment temperature for obtaining

1 crystalline MnO<sub>2</sub> is adopted at 500 °C.

2

3 **Table S1.** BET surface area and porosity of a-MnO<sub>2</sub>/AB and a-MnO<sub>2</sub>-500/AB samples.

| Sample                     | BET surface area<br>(m <sup>2</sup> /g) | Pore volume<br>(cm <sup>3</sup> /g) | Pore width<br>(nm) |
|----------------------------|-----------------------------------------|-------------------------------------|--------------------|
| a-MnO <sub>2</sub> /AB     | 165.95                                  | 0.28                                | 6.788              |
| a-MnO <sub>2</sub> -500/AB | 146.38                                  | 0.27                                | 7.388              |

4

5

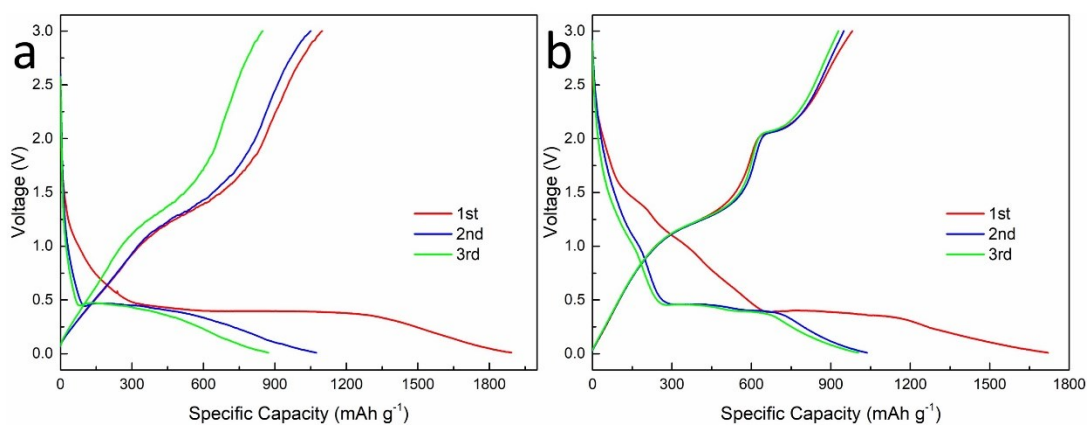

6

7 **Fig. S5.** Galvanostatic discharge/charge curves of a-MnO<sub>2</sub> and a-MnO<sub>2</sub>-500/AB at 0.1 A g<sup>-1</sup>.

8

9 **Table S2.** A summary of the electrochemical performance of the a-MnO<sub>2</sub>/AB sample and other

10

oxide/carbon materials.

| Materials                          | Initial coulomb efficiency | Reversible capacity (mAh g <sup>-1</sup> ) [C-rate A g <sup>-1</sup> ] | Capacity retention (mAh g <sup>-1</sup> ) (after n cycles) [C-rate A g <sup>-1</sup> ] | Ref. |
|------------------------------------|----------------------------|------------------------------------------------------------------------|----------------------------------------------------------------------------------------|------|
| Amorphous MnO <sub>2</sub>         | -                          | 180 [1.6]                                                              | 530 (n=50) [0.1]                                                                       | [14] |
| Amorphous MnO <sub>2</sub> /RGO    | 53.0%                      | 295 [2]                                                                | 784 (n=500) [1]                                                                        | [21] |
| MnO <sub>2</sub> @TiO <sub>2</sub> | 86.0%                      | 87 [6]                                                                 | 938 (n=200) [0.3]                                                                      | [3]  |

|                                                                |       |           |               |      |
|----------------------------------------------------------------|-------|-----------|---------------|------|
| $\beta$ -MnO <sub>2</sub> /RGO                                 | 50.5% | 159 [1]   | 420           | [18] |
|                                                                |       |           | (n=50) [0.1]  |      |
| NiO@MnO <sub>2</sub>                                           | 75.8% | 787 [5]   | 1000          | [32] |
|                                                                |       |           | (n=160) [1]   |      |
| MnO <sub>2</sub> @Fe <sub>3</sub> O <sub>4</sub> /CNT          | 58.0% | 300 [10]  | 873           | [33] |
|                                                                |       |           | (n=500) [2]   |      |
| 3D $\delta$ -MnO <sub>2</sub>                                  | 72.0% | 135 [2]   | 1150          | [45] |
|                                                                |       |           | (n=200) [1]   |      |
| SnS <sub>2</sub> /C                                            | -     | 150 [1]   | 428           | [34] |
|                                                                |       |           | (n=50) [1]    |      |
| SiO <sub>2</sub> /Fe <sub>3</sub> O <sub>4</sub> /C            | 62.7% | 50 [1.6]  | 140           | [35] |
|                                                                |       |           | (n=100) [0.1] |      |
| Fe <sub>2</sub> O <sub>3</sub> /Mn <sub>2</sub> O <sub>3</sub> | 62.0% | 435 [2]   | 400           | [37] |
|                                                                |       |           | (n=500) [1]   |      |
| a-MnO <sub>2</sub> /AB                                         | 72.3% | 318 [9.6] | 1300          | This |
|                                                                |       |           | (n=300) [1]   | work |

1

2

**Table S3.** The  $R_{ct}$  of the a-MnO<sub>2</sub>/AB and a-MnO<sub>2</sub>-500/AB samples.

| Sample                     | After 1              | After 5              | After 10             | After 50             | After 100            | After 200            |
|----------------------------|----------------------|----------------------|----------------------|----------------------|----------------------|----------------------|
|                            | cycle                | cycle                | cycle                | cycle                | cycle                | cycle                |
|                            | $R_{(sf+ct)}/\Omega$ | $R_{(sf+ct)}/\Omega$ | $R_{(sf+ct)}/\Omega$ | $R_{(sf+ct)}/\Omega$ | $R_{(sf+ct)}/\Omega$ | $R_{(sf+ct)}/\Omega$ |
| a-MnO <sub>2</sub> /AB     | 37.16                | 22.05                | 32.04                | 31.55                | 28.13                | 30.30                |
| a-MnO <sub>2</sub> -500/AB | 38.44                | 42.21                | 69.24                | 102.01               | 237.86               | 462.19               |

3

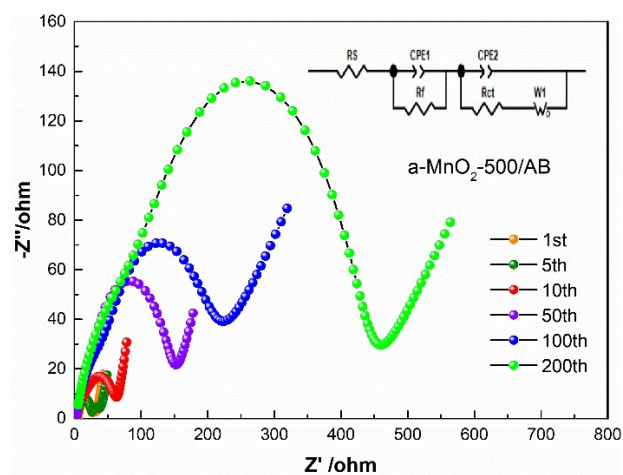

4

5

**Fig. S6.** Impedance measurements of a-MnO<sub>2</sub>-500/AB after 1st, 5th, 10th, 50th, 100th and

6

200th cycle at 1 A g<sup>-1</sup>.

1 The reaction kinetics of the a-MnO<sub>2</sub>/AB electrode were further explored in detail  
 2 by CV measurements. The relationship between the current (i) and the sweep rate (v),  
 3 as shown in the following equation: <sup>1</sup>

$$4 \quad i = av^b \quad (1)$$

5 Where a and b are two changeable parameters. It is well-known that b-value of  
 6 0.5 means total diffusion control behavior and b-value of 1 indicates capacitive  
 7 process. <sup>2</sup> In addition, the capacity contribution from capacitive and diffusion-  
 8 controlled charge can be calculated on the basis of the relationship:

$$9 \quad i = k_1v + k_2v^{1/2} \quad (2)$$

10 Where  $k_1v$  and  $k_2v^{1/2}$  represent the capacitive process and  
 11 diffusion-controlled process, respectively.

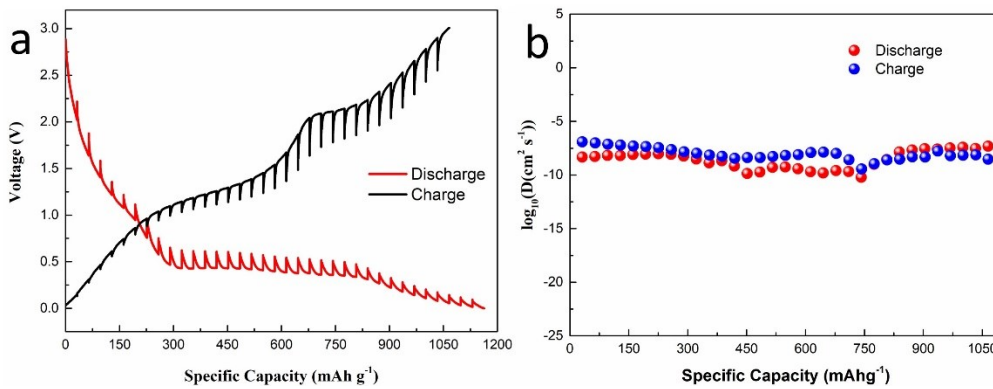

12  
 13 **Fig. S7. (a) GITT curves and (b) corresponding D<sub>Li<sup>+</sup></sub> diffusion coefficients of a-MnO<sub>2</sub>-**  
 14 **500/AB electrodes.**

15 The lithium-ion diffusion coefficient (D<sub>Li<sup>+</sup></sub>) is calculated GITT (Fig. S6)  
 16 according to the following equations: <sup>3</sup>

$$17 \quad D_{Li+} = \frac{4}{\pi\tau} \left( \frac{m_B V_M}{M_B S} \right)^2 \left( \frac{\Delta E_S}{\Delta E_\tau} \right)^2$$

18 (3)

1        Where  $m_B$ ,  $V_M$  and  $M_B$  are the active mass loading, molar volume and molar  
2 mass, respectively,  $S$  is the area of the electrode-electrolyte interface,  $\tau$  is the constant  
3 current pulse duration and  $\Delta E\tau$  is the total change in the battery voltage during a  
4 constant current pulse  $\tau$ .  $\Delta E_s$  is the change in steady-state voltage during constant  
5 current titration.

6

## 7 **References**

- 8 1.        X. Liu, X. Zhang, S. Ma, S. Tong, X. Han and H. Wang, *Electrochimica Acta*,  
9        2020, **333**, 135568.
- 10 2.        K. Liu, J.a. Wang, J. Yang, D. Zhao, P. Chen, J. Man, X. Yu, Z. Wen and J.  
11        Sun, *Chemical Engineering Journal*, 2021, **407**, 127190.
- 12 3.        M. Liao, J. Wang, L. Ye, H. Sun, Y. Wen, C. Wang, X. Sun, B. Wang and H.  
13        Peng, *Angew Chem Int Ed Engl*, 2020, **59**, 2273-2278.
